# Supplementary material
Source: publisher figshare collection journal article supplement (https://tandf.figshare.com/articles/dataset/_/21295520)
Supplement: Supplementary file 1 [file 1]

| Ceramide     |            |            |                                                                        | Atlantic salmon Skin |             | Atlantic salmon Gills |             | c salmon Stomach+Eso |             | antonic salmon Pyloric |             | caktlantic salmon Intestin- |                        |
|--------------|------------|------------|------------------------------------------------------------------------|----------------------|-------------|-----------------------|-------------|----------------------|-------------|------------------------|-------------|-----------------------------|------------------------|
| m/z          | Sphingosin | Fatty acid | Supposed structure                                                     | RT                   | Relative ab | RT                    | Relative ab | RT                   | Relative ab | RT                     | Relative ab | RT                          | Relative abundance (%) |
| 750.8        | d18:1      | 14:0       | SO3-Galβ1-Cer                                                          | 3.0                  | 3.4         | nd                    | 0.0         | nd                   | 0.0         | 1.8                    | 33.3        | nd                          | 0.0                    |
| 888.8        | d18:1      | 24:1       | SO3-Galβ1-Cer                                                          | 5.0                  | 34.7        | 0.6                   | 31.6        | nd                   | 0.0         | 4.4                    | 11.8        | nd                          | 0.0                    |
| 902.8        | d18:1      | 25:1       | SO3-Galβ1-Cer                                                          | 6.0                  | 5.5         | nd                    | 0.0         | nd                   | 0.0         | nd                     | 0.0         | nd                          | 0.0                    |
| 904.8        | d18:1      | h24:1      | SO3-Galβ1-Cer                                                          | 6.0                  | 10.5        | 2.4                   | 2.6         | nd                   | 0.0         | nd                     | 0.0         | nd                          | 0.0                    |
| 977.7        | d18:1      | h14:0      | NeuAcα2-3Galβ1-Cer                                                     | 18.1                 | 0.1         | nd                    | 0.0         | nd                   | 0.0         | nd                     | 0.0         | 13.6                        | 22.9                   |
| 1005.8       | d18:1      | h16:0      | NeuAcα2-3Galβ1-Cer                                                     | 18.1                 | 0.1         | nd                    | 0.0         | nd                   | 0.0         | 12.6                   | 0.9         | 13.8                        | 10.0                   |
| 1115.8       | d18:1      | h24:1      | NeuAcα2-3Galβ1-Cer                                                     | 17.9                 | 0.3         | nd                    | 0.0         | nd                   | 0.0         | 12.6                   | 7.2         | 13.1                        | 7.6                    |
| 1129.8       | d18:1      | h25:1      | NeuAcα2-3Galβ1-Cer                                                     | nd                   | 0.0         | nd                    | 0.0         | nd                   | 0.0         | 12.6                   | 0.3         | 13.1                        | 2.0                    |
| 1131.8       | d18:1      | h25:0      | NeuAcα2-3Galβ1-Cer                                                     | nd                   | 0.0         | nd                    | 0.0         | nd                   | 0.0         | 12.5                   | 0.3         | nd                          | 0.0                    |
| 1123.7       | d18:1      | 14:0       | NeuAcα2-3Galβ1-4Glcβ1-Cer                                              | 20.2                 | 0.8         | 10.3                  | 3.3         | 10.2                 | 4.4         | 13.1                   | 1.0         | nd                          | 0.0                    |
| 1151.7       | d18:1      | 16:0       | NeuAcα2-3Galβ1-4Glcβ1-Cer                                              | 20.2                 | 0.9         | 10.4                  | 3.6         | nd                   | 0.0         | nd                     | 0.0         | nd                          | 0.0                    |
| 1261.8       | d18:1      | 24:1       | NeuAcα2-3Galβ1-4Glcβ1-Cer                                              | 20.2                 | 4.4         | 10.4                  | 5.9         | 11.4                 | 13.8        | 13.2                   | 0.4         | nd                          | 0.0                    |
| 1277.8       | d18:1      | h24:1      | NeuAcα2-3Galβ1-4Glcβ1-Cer                                              | 20.8                 | 2.7         | 10.4                  | 4.9         | nd                   | 0.0         | 13.3                   | 0.3         | nd                          | 0.0                    |
| 1279.8       | d18:1      | h24:0      | NeuAcα2-3Galβ1-4Glcβ1-Cer                                              | 20.7                 | 2.0         | 10.4                  | 4.9         | 11.8                 | 6.6         | nd                     | 0.0         | nd                          | 0.0                    |
| 707.2/1415.7 | d18:1      | 14:0       | NeuAcα2-8NeuAcα2-3Galβ1-4Glcβ1-Cer                                     | 21.8                 | 3.6         | nd                    | 0.0         | nd                   | 0.0         | nd                     | 0.0         | nd                          | 0.0                    |
| 721.2/1442.7 | d18:1      | 16:0       | NeuAcα2-8NeuAcα2-3Galβ1-4Glcβ1-Cer                                     | 22.0                 | 1.0         | nd                    | 0.0         | 11.7                 | 15.4        | nd                     | 0.0         | nd                          | 0.0                    |
| 729.1/1458.7 | d18:1      | h16:0      | NeuAcα2-8NeuAcα2-3Galβ1-4Glcβ1-Cer                                     | nd                   | 0.0         | nd                    | 0.0         | nd                   | 0.0         | 13.7                   | 2.1         | nd                          | 0.0                    |
| 776.2/1552.8 | d18:1      | 24:1       | NeuAcα2-8NeuAcα2-3Galβ1-4Glcβ1-Cer                                     | 22.3                 | 11.8        | 11.2                  | 28.0        | 11.8                 | 27.6        | 13.6                   | 1.1         | nd                          | 0.0                    |
| 784.2/1568.8 | d18:1      | h24:1      | NeuAcα2-8NeuAcα2-3Galβ1-4Glcβ1-Cer                                     | 22.3                 | 5.7         | nd                    | 0.0         | 11.7                 | 15.8        | 13.7                   | 3.2         | nd                          | 0.0                    |
| 785.2/1570.8 | d18:1      | h24:0      | NeuAcα2-8NeuAcα2-3Galβ1-4Glcβ1-Cer                                     | nd                   | 0.0         | 11.2                  | 15.1        | 11.7                 | 16.3        | nd                     | 0.0         | nd                          | 0.0                    |
| 792.1/1584.7 | d18:1      | h25:0      | NeuAcα2-8NeuAcα2-3Galβ1-4Glcβ1-Cer                                     | nd                   | 0.0         | nd                    | 0.0         | nd                   | 0.0         | 13.7                   | 1.3         | nd                          | 0.0                    |
| 874.5        | d18:1      | h16:0      | NeuAcα2-8NeuAcα2-8NeuAcα2-3Galβ1-4Glcβ1-Cer                            | nd                   | 0.0         | nd                    | 0.0         | nd                   | 0.0         | 15.9                   | 1.8         | nd                          | 0.0                    |
| 619.8/929.6  | d18:1      | h24:1      | NeuAcα2-8NeuAcα2-8NeuAcα2-3Galβ1-4Glcβ1-Cer                            | nd                   | 0.0         | nd                    | 0.0         | nd                   | 0.0         | 16.3                   | 18.0        | nd                          | 0.0                    |
| 625.6/938.6  | t18:0      | h24:1      | NeuAcα2-8NeuAcα2-8NeuAcα2-3Galβ1-4Glcβ1-Cer                            | nd                   | 0.0         | nd                    | 0.0         | nd                   | 0.0         | 16.5                   | 10.6        | nd                          | 0.0                    |
| 716.6/1075.1 | d18:1      | h24:1      | NeuAcα2-8NeuAcα2-8NeuAcα2-8NeuAcα2-3Galβ1-4Glcβ1-Cer                   | nd                   | 0.0         | nd                    | 0.0         | nd                   | 0.0         | 17.4                   | 1.5         | nd                          | 0.0                    |
| 995.6        | d18:1      | h24:1      | Fuc-HexNac-Galβ1-3GalNAcβ1-4(NeuAcα2-3)Galβ1-4Glcβ1-Cer                | nd                   | 0.0         | nd                    | 0.0         | nd                   | 0.0         | nd                     | 0.0         | 15.7                        | 15.1                   |
| 1003.7       | d18:1      | h25:1      | Fuc-HexNac-Galβ1-3GalNAcβ1-4(NeuAcα2-3)Galβ1-4Glcβ1-Cer                | nd                   | 0.0         | nd                    | 0.0         | nd                   | 0.0         | nd                     | 0.0         | 15.9                        | 11.0                   |
| 1004.7       | t18:0      | h24:1      | Fuc-HexNac-Galβ1-3GalNAcβ1-4(NeuAcα2-3)Galβ1-4Glcβ1-Cer                | nd                   | 0.0         | nd                    | 0.0         | nd                   | 0.0         | nd                     | 0.0         | 15.9                        | 12.6                   |
| 1098.2       | d18:1      | h24:0      | HexNac-(Fuc-)HexNac-Galβ1-3GalNAcβ1-4(NeuAcα2-3)Galβ1-4Glcβ1-Cer       | 20.1                 | 0.3         | nd                    | 0.0         | nd                   | 0.0         | nd                     | 0.0         | nd                          | 0.0                    |
| 958.7        | d18:1      | 24:1       | NeuAcα2-3Galβ1-3GalNAcβ1-4(NeuAcα2-3)Galβ1-4Glcβ1-Cer                  | 23.2                 | 2.7         | nd                    | 0.0         | nd                   | 0.0         | 15.3                   | 0.7         | nd                          | 0.0                    |
| 966.7        | d18:1      | h24:1      | NeuAcα2-3Galβ1-3GalNAcβ1-4(NeuAcα2-3)Galβ1-4Glcβ1-Cer                  | 23.2                 | 1.3         | nd                    | 0.0         | nd                   | 0.0         | nd                     | 0.0         | nd                          | 0.0                    |
| 967.7        | d18:1      | h24:0      | NeuAcα2-3Galβ1-3GalNAcβ1-4(NeuAcα2-3)Galβ1-4Glcβ1-Cer                  | 23.0                 | 1.0         | nd                    | 0.0         | nd                   | 0.0         | nd                     | 0.0         | nd                          | 0.0                    |
| 958.7        | d18:1      | 24:1       | Galβ1-3GalNAcβ1-4(NeuAcα2-8NeuAcα2-3)Galβ1-4Glcβ1-Cer                  | 25.0                 | 3.0         | nd                    | 0.0         | nd                   | 0.0         | nd                     | 0.0         | nd                          | 0.0                    |
| 966.7        | d18:1      | h24:1      | Galβ1-3GalNAcβ1-4(NeuAcα2-8NeuAcα2-3)Galβ1-4Glcβ1-Cer                  | 25.6                 | 1.0         | nd                    | 0.0         | nd                   | 0.0         | nd                     | 0.0         | nd                          | 0.0                    |
| 967.7        | d18:1      | h24:0      | Galβ1-3GalNAcβ1-4(NeuAcα2-8NeuAcα2-3)Galβ1-4Glcβ1-Cer                  | 25.5                 | 0.7         | nd                    | 0.0         | nd                   | 0.0         | nd                     | 0.0         | nd                          | 0.0                    |
| 1068.1       | d18:1      | h24:1      | HexNac-Galβ1-3GalNAcβ1-4(NeuAcα2-8NeuAcα2-3)Galβ1-4Glcβ1-Cer           | nd                   | 0.0         | nd                    | 0.0         | nd                   | 0.0         | 17.1                   | 1.5         | nd                          | 0.0                    |
| 1141.2       | d18:1      | h24:1      | Fuc-HexNac-Galβ1-3GalNAcβ1-4(NeuAcα2-8NeuAcα2-3)Galβ1-4Glcβ1-Cer       | nd                   | 0.0         | nd                    | 0.0         | nd                   | 0.0         | 17.5                   | 0.3         | 16.4                        | 8.4                    |
| 1150.2       | t18:0      | h24:1      | Fuc-HexNac-Galβ1-3GalNAcβ1-4(NeuAcα2-8NeuAcα2-3)Galβ1-4Glcβ1-Cer       | nd                   | 0.0         | nd                    | 0.0         | nd                   | 0.0         | 17.5                   | 0.1         | 16.3                        | 2.2                    |
| 1149.2       | d18:1      | h24:1      | Fuc-HexNac-Galβ1-3GalNAcβ1-4(NeuGα2-8NeuAcα2-3)Galβ1-4Glcβ1-Cer        | nd                   | 0.0         | nd                    | 0.0         | nd                   | 0.0         | nd                     | 0.0         | 16.4                        | 1.0                    |
| 736.3/1104.6 | d18:1      | 24:1       | NeuAcα2-3Galβ1-3GalNAcβ1-4(NeuAcα2-8NeuAcα2-3)Galβ1-4Glcβ1-Cer         | 25.6                 | 1.9         | nd                    | 0.0         | nd                   | 0.0         | nd                     | 0.0         | nd                          | 0.0                    |
| 809.3/1214.1 | d18:1      | h24:1      | NeuAcα2-3HexNac-Galβ1-3GalNAcβ1-4(NeuAcα2-8NeuAcα2-3)Galβ1-4Glcβ1-Cer  | nd                   | 0.0         | nd                    | 0.0         | nd                   | 0.0         | 18.1                   | 1.6         | nd                          | 0.0                    |
| 926.7        | d18:1      | 14:0       | NeuAcα2-3Galβ1-3GalNAcβ1-4Galβ1-3GalNAcβ1-4Galβ1-4Glcβ1-Cer            | nd                   | 0.0         | nd                    | 0.0         | nd                   | 0.0         | 18.4                   | 0.6         | 17.3                        | 7.1                    |
| 1141.2       | d18:1      | 24:1       | Galβ1-3GalNAcβ1-4Galβ1-3GalNAcβ1-4(NeuAcα2-8NeuAcα2-3)Galβ1-4Glcβ1-Cer | 28.3                 | 0.4         | nd                    | 0.0         | nd                   | 0.0         | nd                     | 0.0         | nd                          | 0.0                    |
