# Supplementary material
Source: publisher figshare collection journal article supplement (https://tandf.figshare.com/articles/dataset/_/21295520)
Supplement: Supplementary file 2 [file 1]

| [M-H] <sup>-</sup> | m/z    | Tentative structure                                               | Atlantic salmon Skin |                        | Atlantic salmon Gills |                        | Atlantic salmon Stomach+Esophagus |                        | Atlantic salmon Pyloric caeca |                        | Atlantic salmon Intestine |                        |
|--------------------|--------|-------------------------------------------------------------------|----------------------|------------------------|-----------------------|------------------------|-----------------------------------|------------------------|-------------------------------|------------------------|---------------------------|------------------------|
|                    |        |                                                                   | RT                   | Relative abundance (%) | RT                    | Relative abundance (%) | RT                                | Relative abundance (%) | RT                            | Relative abundance (%) | RT                        | Relative abundance (%) |
| 706.2              | 706.2  | GalNAc-Gal-Gal $\alpha$ 1-4Glc                                    | nd                   | 0.0                    | 15.6/16.6             | 11.3                   | nd                                | 0.0                    | nd                            | 0.0                    | nd                        | 0.0                    |
| 706.2              | 706.2  | Gal $\beta$ 1-4GlcNAc $\beta$ 1-3Gal $\alpha$ 1-4Glc              | 19.8*                | 10.0                   | 19.7                  | 6.0                    | 19.7*                             | 14.5                   | 19.7                          | 17.9                   | 19.8*                     | 39.6                   |
| 852.3              | 852.3  | Fuc-HexNAc-Gal-Gal $\alpha$ 1-4Glc                                | nd                   | 0.0                    | 17.0/17.3             | 9.9                    | nd                                | 0.0                    | nd                            | 0.0                    | nd                        | 0.0                    |
| 852.3              | 852.3  | Fuc-HexNAc-Gal-Gal $\alpha$ 1-4Glc                                | nd                   | 0.0                    | 18.7                  | 18.2                   | nd                                | 0.0                    | nd                            | 0.0                    | nd                        | 0.0                    |
| 868.2              | 868.2  | Gal-GalNAc-(Gal-)Gal $\alpha$ 1-4Glc                              | nd                   | 0.0                    | nd                    | 0.0                    | 13.8/14.4*                        | 16.9                   | nd                            | 0.0                    | nd                        | 0.0                    |
| 868.2              | 868.2  | Gal-GalNAc-Gal-Gal $\alpha$ 1-4Glc                                | nd                   | 0.0                    | 17.5/18.1             | 19.5                   | nd                                | 0.0                    | nd                            | 0.0                    | nd                        | 0.0                    |
| 868.2              | 868.2  | Gal-Gal $\beta$ 1-4GlcNAc $\beta$ 1-3Gal $\alpha$ 1-4Glc          | 22.8/23.3*           | 90.0                   | 22.7/23.1             | 13.0                   | 22.6/23.3                         | 34.2                   | 22.6/23.3                     | 16.9                   | nd                        | 0.0                    |
| 1014.2             | 1014.2 | Fuc-HexNAc-Gal-(Gal-)Gal- $\alpha$ 1-4Glc                         | nd                   | 0.0                    | 21.3/21.7*            | 1.8                    | nd                                | 0.0                    | nd                            | 0.0                    | nd                        | 0.0                    |
| 1055.3             | 1055.3 | Fuc-HexNAc1-3Gal $\beta$ 1-3GalNAc $\beta$ 1-4Gal $\alpha$ 1-4Glc | nd                   | 0.0                    | nd                    | 0.0                    | 18.2/19.0*                        | 18.5                   | 19.1*                         | 2.1                    | 19.0*                     | 60.4                   |
| 1071.3             | 1071.3 | Gal-HexNAc-Gal $\beta$ 1-4GalNAc-Gal-Gal $\alpha$ 1-4Glc          | nd                   | 0.0                    | nd                    | 0.0                    | 26.1/26.7*                        | 9.3                    | 26.1/26.7                     | 63.1                   | nd                        | 0.0                    |
| 1217.3             | 1217.3 | Fuc-HexNAc-Gal $\beta$ 1-3GlcNAc-(Gal-)Gal $\alpha$ 1-4Glc        | nd                   | 0.0                    | nd                    | 0.0                    | 16.2/16.6*                        | 6.6                    | nd                            | 0.0                    | nd                        | 0.0                    |
| 1217.3             | 1217.3 | Fuc-HexNAc-Gal $\beta$ 1-4GalNAc-Gal-Gal $\alpha$ 1-4Glc          | nd                   | 0.0                    | 22                    | 20.2                   | nd                                | 0.0                    | nd                            | 0.0                    | nd                        | 0.0                    |

\*Identified from MS1 and retention time
